# Supplementary material
Source: PubMed Central journal article supplement (PMC5225289)

**A**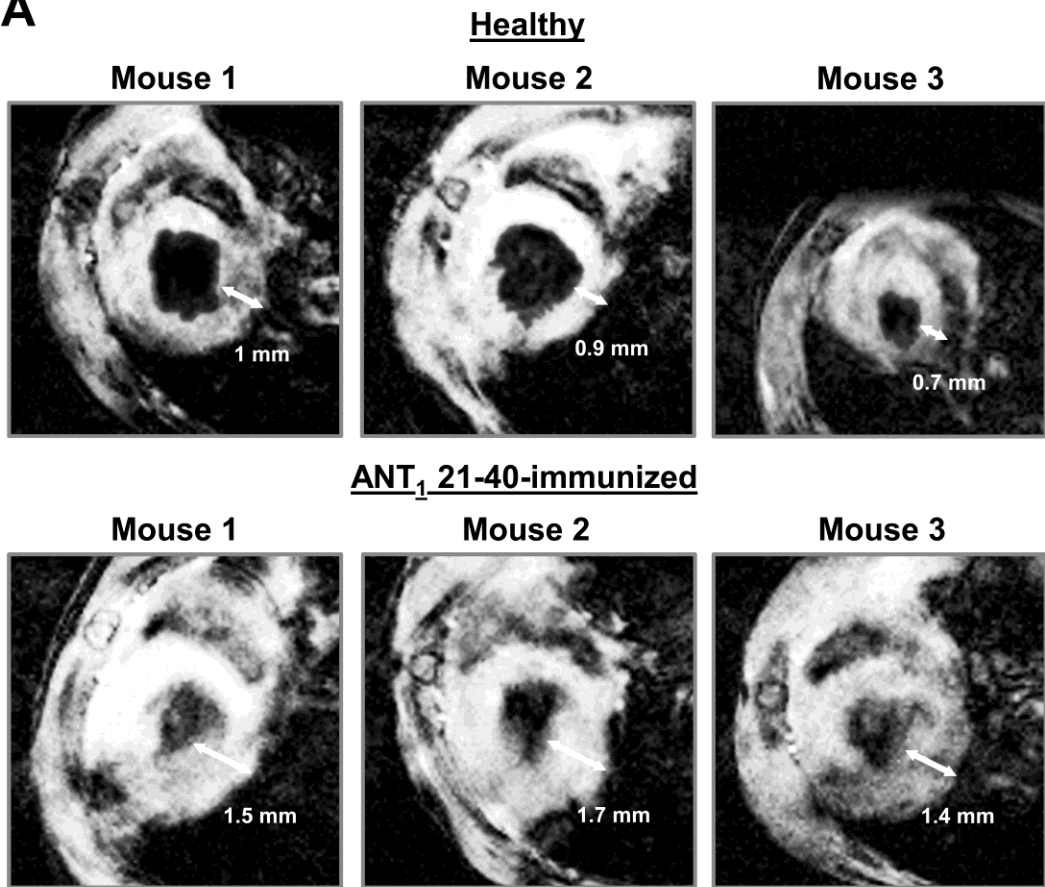**B**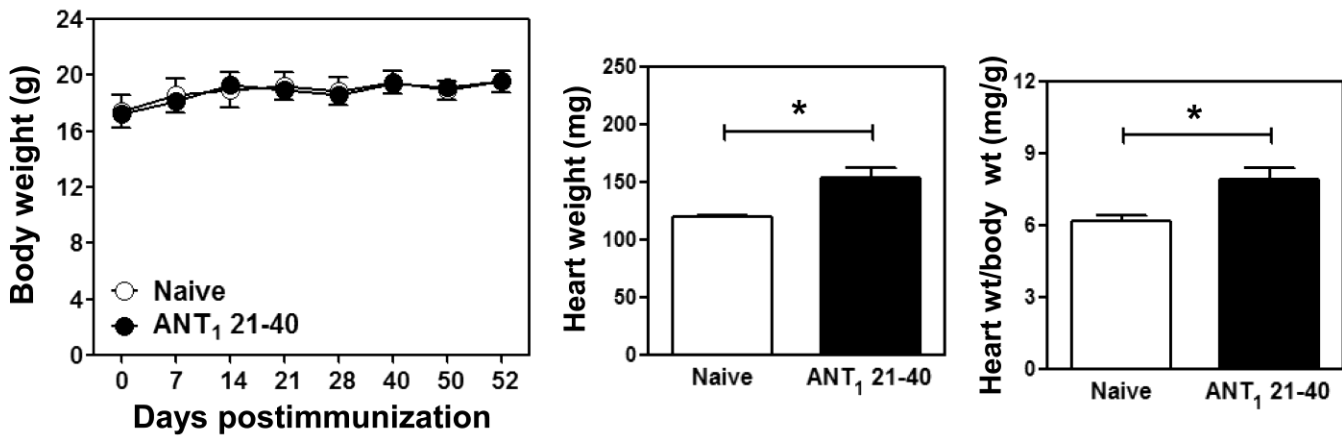

Supplemental Figure S1

Supplement: mmc1.pdf [file mmc1.pdf]

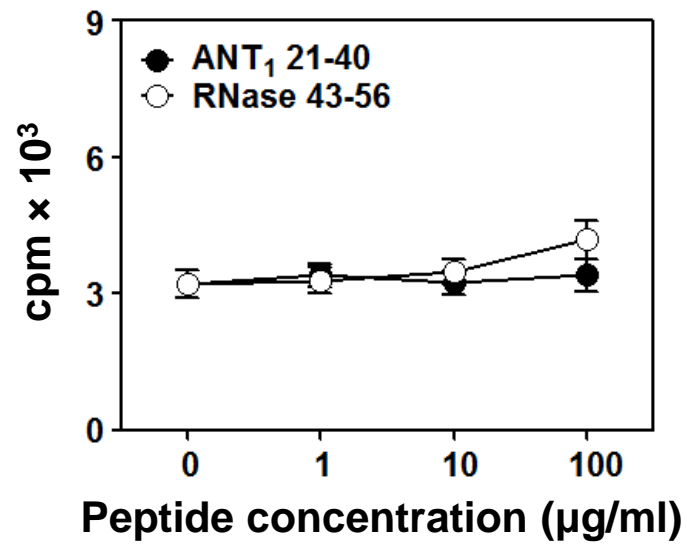

Supplemental Figure S2

Supplement: mmc2.pdf [file mmc2.pdf]

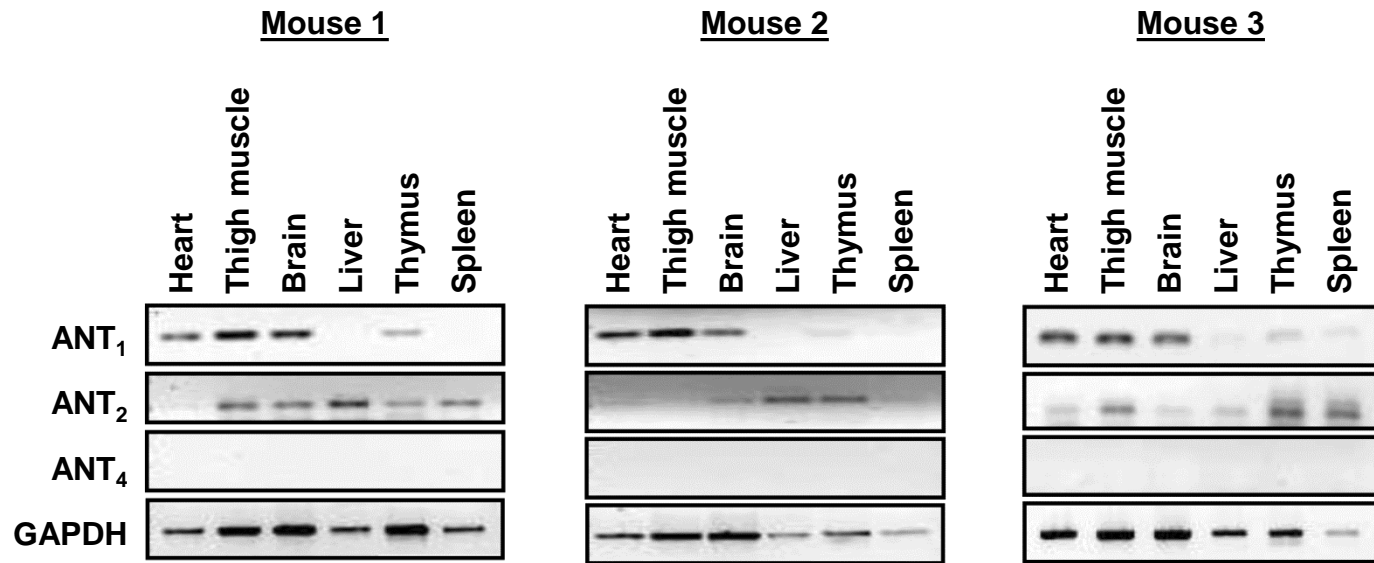

Supplemental Figure S3

Supplement: mmc3.pdf [file mmc3.pdf]

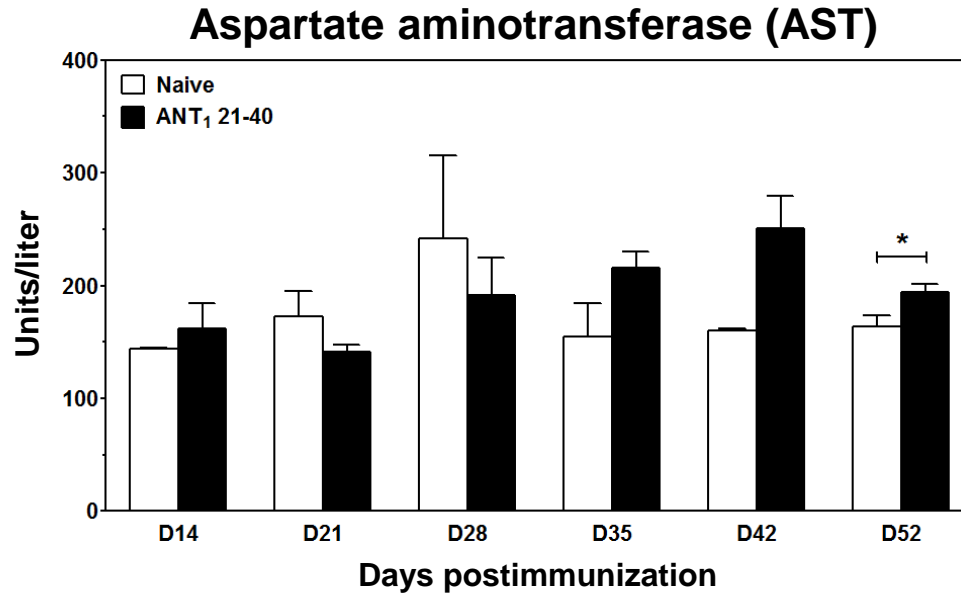

Supplemental Figure S4

Supplement: mmc4.pdf [file mmc4.pdf]

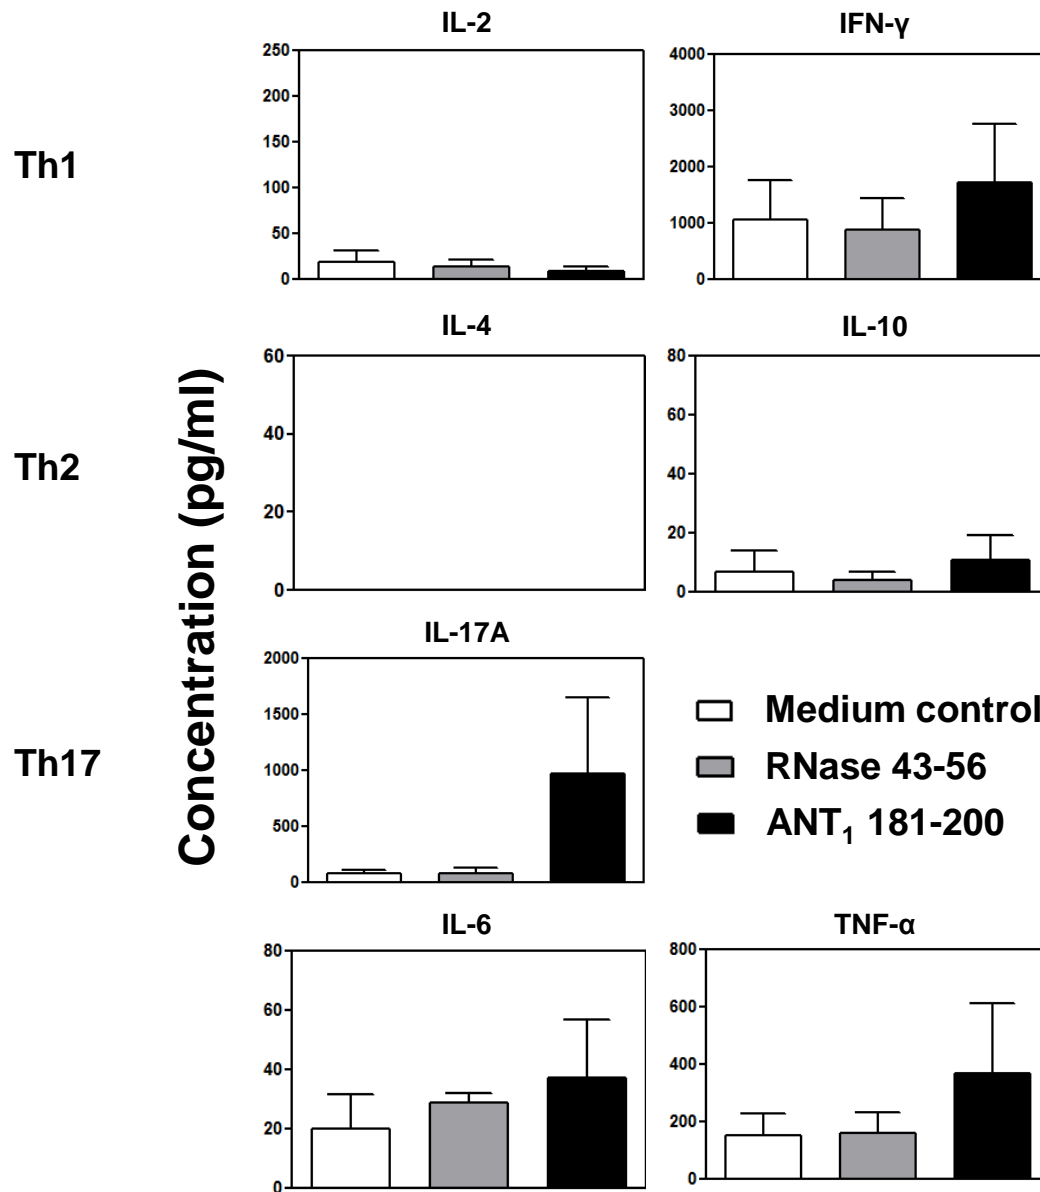

**Supplemental Figure S5**

Supplement: mmc5.pdf [file mmc5.pdf]
